# Supplementary material
Source: PubMed Central journal article supplement (PMC6425711)

MYOC  
CD45

Normal control 1

A

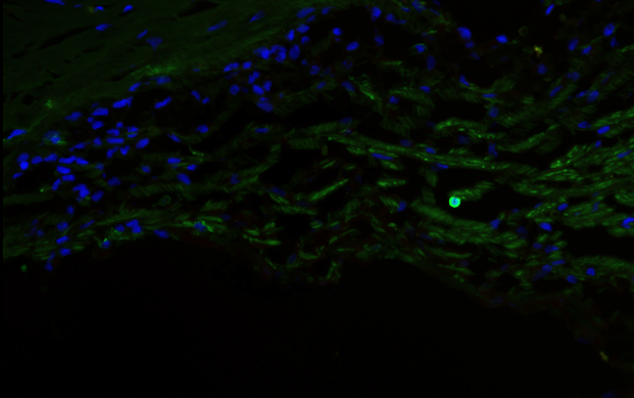

*MYOC* Tyr437His

B

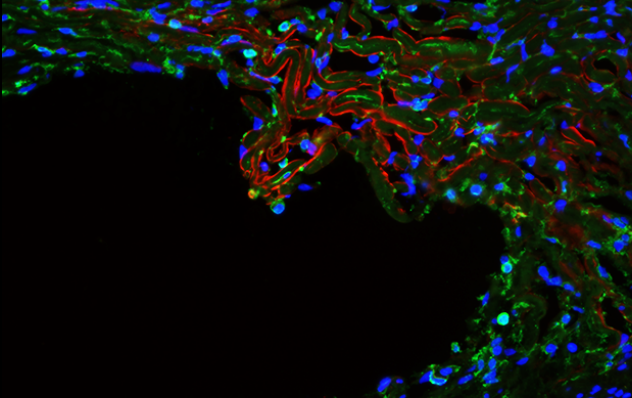

*MYOC* Tyr437His

No primary

C

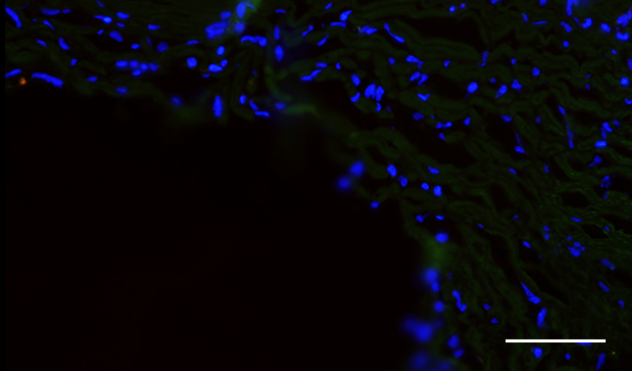

Supplement: NIHMS1506626-supplement-2.pdf [file NIHMS1506626-supplement-2.pdf]
